# Supplementary material for: Conditional cooperation in group contests
Source: PLOS journal article supplement (doi:10.1371/journal.pone.0244152), 2020-12-23
Supplement: S3 (10.1371/journal.pone.0244152.s003) [file journal.pone.0244152.s003]

**S3 Appendix.** S2 Table is the analogue of Table 4, but we replace the standard errors with 95% confidence intervals.

| Dependent variable: Percentage change in individual contribution in round $t$ with respect to $t-1$ |                              |                               |                               |                               |
|-----------------------------------------------------------------------------------------------------|------------------------------|-------------------------------|-------------------------------|-------------------------------|
|                                                                                                     | Spec. 1                      | Spec. 2                       | Spec. 3                       | Spec. 4                       |
| i's contribution ( $t-1$ ) w.r.t avg group contribution ( $t-1$ ) in pc                             | -0.081***<br>[-0.123,-0.040] | -0.074***<br>[-0.115,-0.032]  | 0.001<br>[-0.073,0.074]       | -0.060<br>[-0.136,0.016]      |
| Round                                                                                               | -0.609***<br>[-1.045,-0.173] | -0.628***<br>[-1.061,-0.194]  | -0.600***<br>[-1.033,-0.167]  | -0.622***<br>[-1.050,-0.193]  |
| Winner by chance ( $t-1$ )                                                                          |                              | -2.993<br>[-9.765,3.778]      | -3.310<br>[-10.07,3.447]      | -2.780<br>[-9.498,3.939]      |
| Winner deserved ( $t-1$ )                                                                           |                              | -4.074<br>[-10.43,2.283]      | -5.301<br>[-11.72,1.116]      | -5.388<br>[-11.96,1.184]      |
| Loser by chance ( $t-1$ )                                                                           |                              | -13.375***<br>[-20.18,-6.572] | -14.593***<br>[-21.45,-7.737] | -14.447***<br>[-21.41,-7.480] |
| i's wrt gr's contribution ( $t-1$ ) x winner chance ( $t-1$ )                                       |                              |                               | -0.061<br>[-0.138,0.015]      | -0.056<br>[-0.133,0.021]      |
| i's wrt gr's contribution ( $t-1$ ) x winner deserv ( $t-1$ )                                       |                              |                               | -0.057<br>[-0.143,0.029]      | -0.044<br>[-0.131,0.042]      |
| i's wrt gr's contribution ( $t-1$ ) x loser chance ( $t-1$ )                                        |                              |                               | -0.136***<br>[-0.227,-0.045]  | -0.109**<br>[-0.200,-0.017]   |
| Covariates                                                                                          |                              |                               |                               | YES                           |
| Constant                                                                                            | 1.147<br>[-4.227,6.521]      | 6.187*<br>[-0.459,12.83]      | 7.674**<br>[0.936,14.41]      | -67.432<br>[-157.5,22.68]     |
| R <sup>2</sup>                                                                                      | 0.020                        | 0.034                         | 0.043                         | 0.079                         |
| Observations                                                                                        | 1064                         | 1064                          | 1064                          | 1064                          |

Standard errors in parentheses.

Random effects linear panel regression model.

Dependent variable normalized.

\*  $p < 0.10$ , \*\*  $p < 0.05$ , \*\*\*  $p < 0.01$

**S2 Table.** Determinants of the percentage change in individual's contribution in  $t$  with respect to  $t-1$ . Random effects linear panel regression model.
